# Supplementary material for: Assessing unmet needs in advanced cancer patients: a systematic review of the development, content, and quality of available instruments
Source: Springer Nature journal article supplement (doi:10.1007/s11764-021-01088-6), 2021-08-06
Supplement: MOESM1 [file 19548782]

## **Assessing unmet needs in advanced cancer patients: a systematic review of the development, content, and quality of available instruments**

Ben Rimmer<sup>1\*</sup>, Lisa Crowe<sup>1</sup>, Adam Todd<sup>1,2+</sup>, Linda Sharp<sup>1+</sup>

Author affiliations:

1. *Population Health Sciences Institute, Newcastle University, Newcastle University Centre for Cancer, Newcastle, England*
2. *School of Pharmacy, Newcastle University, Newcastle, England*

*\*Corresponding author: Ben Rimmer, Population Health Sciences Institute, Newcastle University, Sir James Spence Institute, Royal Victoria Infirmary, Newcastle upon Tyne, NE1 4LP.*

*Email: [ben.rimmer@newcastle.ac.uk](mailto:ben.rimmer@newcastle.ac.uk); Phone: 0044 (0)7704 300 509*

*+Joint senior authors*

### **Contents**

|                                                                                                            |    |
|------------------------------------------------------------------------------------------------------------|----|
| Online Resource 1: Search strategy.....                                                                    | 2  |
| Online Resource 2: Database search example.....                                                            | 3  |
| Online Resource 3: Dimension definitions.....                                                              | 4  |
| Online Resource 4: Definitions and COSMIN quality criteria for good measurement properties .....           | 6  |
| Online Resource 5: GRADE levels of evidence.....                                                           | 8  |
| Online Resource 6: Instrument purpose, setting and characteristics of the validation study population..... | 9  |
| Online Resource 7: Validation studies in languages other than English .....                                | 13 |
| Online Resource 8: Other techniques used in instrument development .....                                   | 15 |
| Online Resource 9: References to support development quality appraisal .....                               | 16 |
| Online Resource 10: Dimension development .....                                                            | 17 |
| Online Resource 11: Overall methodological quality appraisal .....                                         | 19 |
| Online Resource 12: GRADE levels of evidence with reasons.....                                             | 19 |
| Online Resource 13: Quality appraisal with reasons.....                                                    | 19 |
| Online Resource 14: Instrument feasibility .....                                                           | 20 |
| Online Resource 15: Instrument interpretability .....                                                      | 25 |

## Online Resource 1: Search strategy

---

| <b>Key area</b>     | <b>Keywords</b>                                                                                                                                          |
|---------------------|----------------------------------------------------------------------------------------------------------------------------------------------------------|
| 1. Cancer           | cancer OR neoplasm/                                                                                                                                      |
| 2. Advanced Disease | advanced OR metastatic OR palliative OR chronic OR end of life<br>OR late stage OR terminal                                                              |
| 3. Needs            | unmet need* OR need* assess* OR perceived need* OR support*<br>care need* OR psycho* need* OR physical need* OR information*<br>need* OR function* need* |
| 4. Instrument       | instrument* OR measure* OR scale* OR survey* OR<br>questionnaire* OR tool* OR inventor* OR checklist*                                                    |

---

## Online Resource 2: Database search example

MEDLINE search (Ovid MEDLINE® 1946 to February Week 4 2020)

| <input type="checkbox"/> | # ▲ | Searches                                     | Results |
|--------------------------|-----|----------------------------------------------|---------|
| <input type="checkbox"/> | 1   | Neoplasms/                                   | 415111  |
| <input type="checkbox"/> | 2   | cancer.mp.                                   | 1445236 |
| <input type="checkbox"/> | 3   | 1 or 2                                       | 1629056 |
| <input type="checkbox"/> | 4   | advanced.mp.                                 | 348001  |
| <input type="checkbox"/> | 5   | metastatic.mp.                               | 188986  |
| <input type="checkbox"/> | 6   | palliative.mp.                               | 76504   |
| <input type="checkbox"/> | 7   | chronic.mp.                                  | 1188586 |
| <input type="checkbox"/> | 8   | end of life.mp.                              | 19105   |
| <input type="checkbox"/> | 9   | late stage.mp.                               | 17948   |
| <input type="checkbox"/> | 10  | terminal.mp.                                 | 397605  |
| <input type="checkbox"/> | 11  | 4 or 5 or 6 or 7 or 8 or 9 or 10             | 2110788 |
| <input type="checkbox"/> | 12  | unmet need*.mp.                              | 9913    |
| <input type="checkbox"/> | 13  | need* assess*.mp.                            | 33079   |
| <input type="checkbox"/> | 14  | perceived need*.mp.                          | 2615    |
| <input type="checkbox"/> | 15  | support* care need*.mp.                      | 555     |
| <input type="checkbox"/> | 16  | psycho* need*.mp.                            | 3041    |
| <input type="checkbox"/> | 17  | physical need*.mp.                           | 376     |
| <input type="checkbox"/> | 18  | information* need*.mp.                       | 6554    |
| <input type="checkbox"/> | 19  | function* need*.mp.                          | 1217    |
| <input type="checkbox"/> | 20  | 12 or 13 or 14 or 15 or 16 or 17 or 18 or 19 | 54039   |
| <input type="checkbox"/> | 21  | instrument*.mp.                              | 851230  |
| <input type="checkbox"/> | 22  | measure*.mp.                                 | 2865427 |
| <input type="checkbox"/> | 23  | scale*.mp.                                   | 683385  |
| <input type="checkbox"/> | 24  | survey*.mp.                                  | 895181  |
| <input type="checkbox"/> | 25  | questionnaire*.mp.                           | 646244  |
| <input type="checkbox"/> | 26  | tool*.mp.                                    | 570111  |
| <input type="checkbox"/> | 27  | inventor*.mp.                                | 91075   |
| <input type="checkbox"/> | 28  | checklist*.mp.                               | 32150   |
| <input type="checkbox"/> | 29  | 21 or 22 or 23 or 24 or 25 or 26 or 27 or 28 | 4997176 |
| <input type="checkbox"/> | 30  | 3 and 11 and 20 and 29                       | 747     |

## Online Resource 3: Dimension definitions

| <b>Dimension</b>                  | <b>Definition</b>                                                                                                                | <b>Example items</b>                                                                                                                                                                                                                                                                                               |
|-----------------------------------|----------------------------------------------------------------------------------------------------------------------------------|--------------------------------------------------------------------------------------------------------------------------------------------------------------------------------------------------------------------------------------------------------------------------------------------------------------------|
| <i>Physical</i>                   | Needs relating to a symptom of diagnosis or side effect of treatment.                                                            | <ul style="list-style-type: none"> <li>• PCNA-EAV – Dealing with difficulty breathing</li> <li>• SCNS-SF34 – Lack of energy/tiredness</li> </ul>                                                                                                                                                                   |
| <i>Psychological</i>              | Needs relating to feelings and emotions surrounding the cancer journey.                                                          | <ul style="list-style-type: none"> <li>• PNAP – Being pain free</li> <li>• YYFcore03 – Feeling down or depressed</li> <li>• NA-ACP – Dealing with anxiety or stress</li> <li>• CNAT – Feelings of anger, irritability, or nervousness</li> </ul>                                                                   |
| <i>Information</i>                | Needs for more information, knowledge, or understanding about all aspects of the cancer journey.                                 | <ul style="list-style-type: none"> <li>• Ndiok – I need more information about my diagnosis</li> <li>• PNI – Information about medication and side effects</li> <li>• SCNS-LF59 – To be given written information about the important aspects of your care</li> </ul>                                              |
| <i>Social</i>                     | Needs concerning relationships with friends, family, and partners.                                                               | <ul style="list-style-type: none"> <li>• PNPC-SV – Problems in the relationship with life companion</li> <li>• 3LNQ – Difficulties with family life and contact to friends</li> <li>• CNQ-SF – Coping with changes in other people’s attitudes and behaviour towards you</li> </ul>                                |
| <i>Activities of daily living</i> | Needs relating to essential activities necessary for everyday functioning.                                                       | <ul style="list-style-type: none"> <li>• PNAP – Being able to take care of your body (washing, dressing, food)</li> <li>• eHNA – Preparing meals or drinks</li> <li>• SPARC – Changes in your ability to carry out your usual household tasks such as cooking for yourself or cleaning the house</li> </ul>        |
| <i>Health care</i>                | Needs relating to the individual’s access to treatment and/or support services and their relationship with health professionals. | <ul style="list-style-type: none"> <li>• SPEED – How much difficulty are you having getting medical care that fits with your goals?</li> <li>• SCNAT-IP – Having access to professional counselling if you or your family and friends need it</li> <li>• PCNQ V2 – My specialist(s) are very supportive</li> </ul> |
| <i>Spiritual</i>                  | Needs that relate to finding meaning, purpose, and value in life, though not necessarily religious.                              | <ul style="list-style-type: none"> <li>• SPARC – Religious or spiritual needs not being met</li> <li>• NA-ACP – Clarifying your spiritual beliefs</li> <li>• PNPC – Difficulties concerning the meaning of death</li> </ul>                                                                                        |
| <i>Sexual</i>                     | Needs relating to an individual’s intimate relationships and sexual function.                                                    | <ul style="list-style-type: none"> <li>• 3LNQ – Difficulties with sex life</li> <li>• SCNS-ST9 – Changes in sexual relationships</li> <li>• CSS-25 – Intimacy, sexual function and/or fertility</li> </ul>                                                                                                         |
| <i>Economic</i>                   | Needs relating to an individual’s finances and resources.                                                                        | <ul style="list-style-type: none"> <li>• NA-ALCP – Dealing with concerns about your financial situation</li> <li>• NEQ – I need economic help</li> <li>• CSS-25 – Health insurance or money worries</li> </ul>                                                                                                     |
| <i>Autonomy</i>                   | Needs relating to an individual’s ability to do things for themselves.                                                           | <ul style="list-style-type: none"> <li>• Ndiok – Frustrations because one can do less than before</li> <li>• CaNDI – Concerns about being unable to take care of myself</li> </ul>                                                                                                                                 |

---

| <b>Dimension</b> | <b>Definition</b>                                                                                 | <b>Example items</b>                                                                                                                                                                                                                                                      |
|------------------|---------------------------------------------------------------------------------------------------|---------------------------------------------------------------------------------------------------------------------------------------------------------------------------------------------------------------------------------------------------------------------------|
| <i>Role</i>      | Needs relating to an individual's responsibilities and the part they play at home and in society. | <ul style="list-style-type: none"><li>• PNPC-SV – Difficulties in continuing the usual activities</li><li>• PNPC – Difficulties in caring for children or babysitting</li><li>• CaNDI – Managing work, school, or home life</li><li>• eHNA – Work and education</li></ul> |

---

Online Resource 4: Definitions and COSMIN quality criteria for good measurement properties

| Measurement property |                      | Definition <sup>a</sup>                                                                                       | Quality criteria for each property <sup>b,c</sup>                                                                                                                                                                                                                                                                                                                       |                                                                                                                                                                                                                                                                                                                                                                                                                                                                                                                                                                                                                                                                                                              |
|----------------------|----------------------|---------------------------------------------------------------------------------------------------------------|-------------------------------------------------------------------------------------------------------------------------------------------------------------------------------------------------------------------------------------------------------------------------------------------------------------------------------------------------------------------------|--------------------------------------------------------------------------------------------------------------------------------------------------------------------------------------------------------------------------------------------------------------------------------------------------------------------------------------------------------------------------------------------------------------------------------------------------------------------------------------------------------------------------------------------------------------------------------------------------------------------------------------------------------------------------------------------------------------|
| <i>Validity</i>      | Content validity     | The degree to which the content of a PROM is an adequate reflection of the construct to be measured.          | Quality not assessed.                                                                                                                                                                                                                                                                                                                                                   |                                                                                                                                                                                                                                                                                                                                                                                                                                                                                                                                                                                                                                                                                                              |
|                      | Construct validity   | Structural validity                                                                                           | The degree to which the scores of a PROM are an adequate reflection of the dimensionality of the construct to be measured.                                                                                                                                                                                                                                              | +: CTT: CFA: CFI or TLI or comparable measure >0.95 OR RMSEA <0.08<br>IRT/Rasch: No violation of unidimensionality: CFI or TLI or comparable measure >0.95 OR RMSEA <0.06 OR SRMR <0.08<br>AND no violation of local independence: residual correlations among the items after controlling for the dominant factor <0.20 OR Q3's <0.37<br>AND no violation of monotonicity: adequate looking graphs OR item scalability >0.30<br>AND adequate model fit: IRT: $\chi^2 >0.01$<br>Rasch: infit and outfit mean squares $\geq 0.5$ and $\leq 1.5$ OR Z- standardized values > -2 and <2.<br>?: CTT: Not all information for '+' reported.<br>IRT/Rasch: Model fit not reported.<br>-: Criteria for '+' not met. |
|                      |                      | Hypotheses testing                                                                                            | The degree to which the scores of the instrument are consistent with the theoretically derived hypotheses.                                                                                                                                                                                                                                                              | +: The result is in accordance with the hypothesis.<br>?: No hypothesis defined (by the review team)<br>-: The result is not in accordance with the hypothesis.                                                                                                                                                                                                                                                                                                                                                                                                                                                                                                                                              |
| <i>Reliability</i>   | Reliability          | The proportion of the total variance in the measurements which is due to 'true' differences between patients. | +: ICC or weighted Kappa $\geq 0.70$ .<br>?: ICC or weighted Kappa not reported.<br>-: ICC or weighted Kappa <0.70.                                                                                                                                                                                                                                                     |                                                                                                                                                                                                                                                                                                                                                                                                                                                                                                                                                                                                                                                                                                              |
|                      | Internal consistency | The degree of the interrelatedness among the items.                                                           | +: At least low evidence for sufficient structural validity AND Cronbach's alpha(s) $\geq 0.70$ for each unidimensional scale or subscale<br>?: Criteria for "At least low evidence for sufficient structural validity" not met<br>-: At least low evidence for sufficient structural validity AND Cronbach's alpha(s) < 0.70 for each unidimensional scale or subscale |                                                                                                                                                                                                                                                                                                                                                                                                                                                                                                                                                                                                                                                                                                              |
|                      | Measurement error    | The systematic and random error of a patient's score that                                                     | +: SDC or LoA < MIC.<br>?: MIC not defined.                                                                                                                                                                                                                                                                                                                             |                                                                                                                                                                                                                                                                                                                                                                                                                                                                                                                                                                                                                                                                                                              |

| Measurement property  | Definition <sup>a</sup>                                                           | Quality criteria for each property <sup>b,c</sup>                                                                                                                                                         |
|-----------------------|-----------------------------------------------------------------------------------|-----------------------------------------------------------------------------------------------------------------------------------------------------------------------------------------------------------|
|                       | is not attributed to true changes in the construct to be measured.                | -: SDC or LoA > MIC.                                                                                                                                                                                      |
| <i>Responsiveness</i> | The ability of a PROM to detect change over time in the construct to be measured. | +: The result is in accordance with the hypothesis OR AUC ≥ 0.70.<br>?: No hypothesis defined (by the review team).<br>-: The result is not in accordance with the hypothesis <sup>7</sup> OR AUC < 0.70. |

<sup>a</sup>Definitions of the measurement properties are based on Mokkink et al. (2010).

<sup>b</sup>Quality criteria are based on Terwee et al. (2007) and Prinsen et al. (2016).

<sup>c</sup>“+” = sufficient, “?” = indeterminate, “-” = insufficient

AUC = area under the curve, CFA = confirmatory factor analysis, CFI = comparative fit index, CTT = classical test theory, DIF = differential item functioning, ICC = intraclass correlation coefficient, IRT = item response theory, LoA = limits of agreement, MIC = minimal important change, RMSEA: Root Mean Square Error of Approximation, SEM = Standard Error of Measurement, SDC = smallest detectable change, SRMR: Standardized Root Mean Residuals, TLI = Tucker-Lewis index

### Online Resource 5: GRADE levels of evidence

| <b>Quality of evidence</b> | <b>Lower if:</b>                                         |
|----------------------------|----------------------------------------------------------|
| High (†††)                 | <i>Risk of bias</i><br>-1 Serious                        |
| Moderate (††)              | -2 Very serious<br>-3 Extremely serious                  |
| Low (†)                    | <i>Inconsistency</i><br>-1 Serious                       |
| Very low (-)               | -2 Very serious                                          |
|                            | <i>Imprecision</i><br>-1 total n=50-100<br>-2 total n<50 |
|                            | <i>Indirectness</i><br>-1 Serious<br>-2 Very serious     |

n = sample size



## Online Resource 6: Instrument purpose, setting and characteristics of the validation study population

| Instrument     | Instrument purpose                                                                                                        | Study setting  | Study population                                                                                                                                                                                                                                                                                                                                                                                                                                                                                                                                                     |
|----------------|---------------------------------------------------------------------------------------------------------------------------|----------------|----------------------------------------------------------------------------------------------------------------------------------------------------------------------------------------------------------------------------------------------------------------------------------------------------------------------------------------------------------------------------------------------------------------------------------------------------------------------------------------------------------------------------------------------------------------------|
| <i>PNAP</i>    | To identify the needs of patients receiving palliative care.                                                              | Czech Republic | Mixed palliative chronic disease and cancer patients (n = 349):<br>Cancer - n = 225 (64.5%);<br>Chronic disease - n = 124 (35.5%);<br><br>Mouth, pharynx, gastrointestinal tract - n = 54 (24%);<br>Respiratory - n = 37 (16%);<br>Breast, female reproductive organs - n = 43 (19%);<br>Male reproductive organs - n = 19 (8%);<br>Urinary bladder - n = 10 (4%);<br>Eye, central nervous system - n = 11 (5%);<br>Hematopoiesis - n = 18 (8%);<br>Other cancers - n = 16 (7%)                                                                                      |
| <i>SPARC</i>   | To facilitate the referral of patients with advanced illnesses (regardless of diagnosis) into specialist palliative care. | UK             | Patients with an advanced illness (n = 100)                                                                                                                                                                                                                                                                                                                                                                                                                                                                                                                          |
| <i>NA-ACP</i>  | To measure the perceived needs of patients with advanced, incurable cancer.                                               | Australia      | Mixed advanced cancer patients (n = 246):<br>Breast - n = 59 (24%);<br>Bowel/Colon - n = 47 (19%);<br>Lung - n = 26 (11%);<br>Lymph node - n = 25 (10%);<br>Ovary - n = 13 (5%);<br>Prostate - n = 9 (4%);<br>Mouth/throat - n = 8 (3%);<br>Other - n = 51 (21%);<br>Unreported - n = 8 (3%)                                                                                                                                                                                                                                                                         |
| <i>NA-ALCP</i> | To assess the needs of patients with advanced, incurable lung cancer.                                                     | Australia      | Advanced lung cancer patients (n = 108)                                                                                                                                                                                                                                                                                                                                                                                                                                                                                                                              |
| <i>PNPC</i>    | To investigate problems experienced by patients and (unmet) needs for care.                                               | Netherlands    | Mixed palliative cancer patients (those with distant mets) (n = 64):<br>Breast - n = 29 (2 of whom also had cervical cancer) (46%);<br>Lung - n = 3 (4.7%);<br>Esophagus/stomach - n = 1 (1.6%);<br>Colon/ rectum - n = 11 (17.2%);<br>Ovary - n = 5 (7.8%);<br>Malignant melanoma - n = 4 (6.3%);<br>Cervix - n = 3 (2 of whom also had breast cancer) (4.7%);<br>Prostate - n = 2 (3.1%);<br>Neck/ head - n = 1 (1.6%);<br>Hematological/ lymph system - n = 1 (1.6%);<br>Primary liver cancer - n = 1 (1.6%);<br>Pancreas - n = 1 (1.6%);<br>Unknown - n = 4 (6%) |
| <i>PNPC-sv</i> | To measure all dimensions of palliative care, investigating patients' problems and (unmet) needs                          | Netherlands    | Mixed patients with metastatic cancer (n = 94):<br>Breast - n = 37 (39%);<br>Colorectal - n = 14 (15%);<br>Lung - n = 8 (8%);<br>Prostate - n = 6 (6%);<br>Ovary - n = 5 (5%);                                                                                                                                                                                                                                                                                                                                                                                       |

| Instrument      | Instrument purpose                                                                                       | Study setting     | Study population                                                                                                                                                                                                                                                                                                                                                                                                                                                                               |
|-----------------|----------------------------------------------------------------------------------------------------------|-------------------|------------------------------------------------------------------------------------------------------------------------------------------------------------------------------------------------------------------------------------------------------------------------------------------------------------------------------------------------------------------------------------------------------------------------------------------------------------------------------------------------|
| <i>SPEED</i>    | To screen for palliative care needs of patients with cancer presenting to the emergency department.      | USA               | Malignant melanoma - n = 4 (4%);<br>Unreported - n = 21 (23%)<br>Mixed cancer patients with metastatic disease (n = 49):<br>Breast - n = 8 (16%);<br>Colon - n = 7 (14%);<br>Lung - n = 7 (14%);<br>Lymphoma - n = 6 (11%);<br>Unreported - n = 21 (45%)                                                                                                                                                                                                                                       |
| <i>3LNQ</i>     | To measure palliative needs in three ways: problem intensity, problem burden, and felt need.             | Denmark           | Advanced cancer patients (n = 74):<br>Stage III - n = 38 (51%);<br>Stage IV - n = 30 (41%);<br>Unreported - n = 6 (8%)                                                                                                                                                                                                                                                                                                                                                                         |
| <i>Ndiok</i>    | To assess palliative care needs of patients with cancer from the perspective of the patients themselves. | Nigeria           | Brain - n = 2 (3%);<br>Gastrointestinal - n = 24 (32%);<br>Gynecological - n = 10 (13%);<br>Head and neck - n = 5 (7%);<br>Breast - n = 17 (23%);<br>Lung - n = 2 (3%);<br>Hematological - n = 5 (7%);<br>Genitourinary - n = 6 (8%)<br>Other - n = 3 (4%)<br>Mixed cancer patients (n = 429):<br>Breast - n = 165 (38.5%);<br>Cervix - n = 44 (10.3%);<br>Prostate - n = 73 (17%);<br>Skin - n = 23 (5.4%);<br>Lung - n = 50 (11.6%);<br>Other - n = 69 (16.1%);<br>Unreported - n = 5 (1.1%) |
| <i>PCNA-EAV</i> | To measure the health care and support care needs of patients with advanced cancer.                      | Saudi Arabia      | Mixed advanced cancer patients (n = 50):<br>Breast - n = 14 (28%);<br>Lung - n = 4 (8%);<br>Liver - n = 5 (10%);<br>Gastrointestinal - n = 3 (6%);<br>Genitourinary - n = 1 (2%);<br>Lymphoma - n = 9 (18%);<br>Colon - n = 9 (18%);<br>Other - n = 5 (10%)                                                                                                                                                                                                                                    |
| <i>CaNDI</i>    | To identify distressed patients in need of intervention.                                                 | USA               | Mixed cancer patients (n = 100):<br>Stage I - n = 22 (22%);<br>Stage II - n = 19 (19%);<br>Stage III - n = 27 (27%);<br>Stage IV - n = 19 (19%);<br>Unreported - n = 13 (13%)                                                                                                                                                                                                                                                                                                                  |
| <i>CNAT</i>     | To cover cancer patients' needs in a comprehensive way throughout all phases                             | Republic of Korea | Breast - n = 30 (30%);<br>CLL - n = 10 (10%);<br>Colon/rectal - n = 13 (13%);<br>Lung - n = 6 (6%);<br>Myeloma - n = 4 (4%);<br>Ovarian - n = 10 (10%);<br>Other - n = 17 (17%);<br>Multiple site - n = 6 (6%);<br>Missing - n = 4 (4%)<br>Mixed cancer patients (n = 2661):<br>Stomach - n = 399 (15%);<br>Lung - n = 287 (10.8%);                                                                                                                                                            |

| Instrument       | Instrument purpose                                                                                           | Study setting | Study population                                                                                                                                                                                                                                                                                                                                                                                                                                                                        |
|------------------|--------------------------------------------------------------------------------------------------------------|---------------|-----------------------------------------------------------------------------------------------------------------------------------------------------------------------------------------------------------------------------------------------------------------------------------------------------------------------------------------------------------------------------------------------------------------------------------------------------------------------------------------|
|                  | of the cancer experience, from diagnosis to recovery or palliative care                                      |               | Colon/ rectum - n = 324 (12.2%);<br>Breast - n = 325 (12.2%);<br>Cervix - n = 98 (3.7%);<br>Other - n = 1008 (37.9%)                                                                                                                                                                                                                                                                                                                                                                    |
| <i>PNI</i>       | To identify the psychosocial needs of cancer patients, and the contributory factors to need.                 | UK            | Mixed cancer patients (n = 402):<br>Breast - n = 183 (46%);<br>Colorectal - n = 121 (30%);<br>Lung - n = 62 (15%);<br>Lymphoma - n = 36 (9%)                                                                                                                                                                                                                                                                                                                                            |
| <i>eHNA</i>      | To help people living with cancer express all their needs and help those helping them better target support. | UK            | Mixed cancer patients (n = 5421)                                                                                                                                                                                                                                                                                                                                                                                                                                                        |
| <i>SCNS-SF34</i> | To measure cancer patients' perceived needs across a range of domains.                                       | Australia     | Three samples of mixed cancer patients (n = 444, 444, 250):<br>Breast - n = 137 (31%), 139 (31%), 14 (6%);<br>Colorectal - n = 74 (17%), 70 (16%), 21 (8%);<br>Prostate - n = 39 (9%), 35 (8%), 82 (33%);<br>Lung - n = 31 (7%), 32 (7%), 23 (9%);<br>Other - n = 137 (31%), 142 (32%), 110 (44%)                                                                                                                                                                                       |
| <i>SCNAT-IP</i>  | To measure indigenous cancer patients' perceived needs across a range of domains.                            | Australia     | Mixed indigenous cancer patients (n = 29):<br>Gynecological - n = 9 (31%);<br>Lung - n = 7 (24%);<br>Breast - n = 5 (14%);<br>Blood - n = 3 (10%);<br>Bowel - n = 2 (7%);<br>Brain - n = 1 (3%);<br>Prostate - n = 1 (3%);<br>Thyroid - n = 1 (3%)                                                                                                                                                                                                                                      |
| <i>SCNS-ST9</i>  | A brief screening tool to assess the perceived needs of people with cancer.                                  | Australia     | Two samples of mixed cancer patients (n = 977 (development), 481 (validation)):<br>Current cancer site(s) reported in n = 1345):<br>Breast - n = 232 (25.6%), 117 (26.9%);<br>Bowel/colon/rectum - n = 99 (10.9%), 49 (11.3%);<br>Lung - n = 84 (9.3%), 35 (8%);<br>Prostate - n = 66 (7.3%), 40 (9.2%);<br>Melanoma/skin - n = 42 (4.6%), 14 (3.2%);<br>Cervical/ovarian - n = 33 (3.6%), 15 (3.4%);<br>Brain tumour - n = 28 (3.1%), 13 (3%);<br>Other - n = 323 (35.6%), 152 (34.9%) |
| <i>SCNS-LF59</i> | To assess the generic needs of patients with cancer.                                                         | Australia     | Mixed cancer patients (n = 888):<br>Breast - n = 280 (32%);<br>Colon and rectum - n = 150 (17%);<br>Prostate - n = 80 (9%);<br>Lung - n = 67 (8%);<br>Skin/melanoma - n = 43 (5%);<br>Don't know - n = 14 (2%);<br>Other - n = 217 (24%)                                                                                                                                                                                                                                                |
| <i>NEQ</i>       | To evaluate needs expressed by (hospitalised) cancer patients.                                               | Italy         | Mixed cancer patients (n = 423):<br>Colon-rectum - n = 114 (27%);<br>Genitourinary - n = 114 (27%);<br>Breast - n = 93 (22%);<br>Not reported - n = 102 (24%)                                                                                                                                                                                                                                                                                                                           |
| <i>CNQ-sf</i>    | To assess cancer patient's needs across several domains.                                                     | Australia     | Mixed cancer patients (n = 450):<br>No evidence - n = 193 (43%);<br>Localised, asymptomatic - n = 59 (13%);<br>Localised, symptomatic - n = 68 (15%);<br>Metastatic, asymptomatic - n = 45 (10%);                                                                                                                                                                                                                                                                                       |

| Instrument | Instrument purpose                                                                                                                                 | Study setting | Study population                                                                                                                                                                                                       |
|------------|----------------------------------------------------------------------------------------------------------------------------------------------------|---------------|------------------------------------------------------------------------------------------------------------------------------------------------------------------------------------------------------------------------|
|            |                                                                                                                                                    |               | Metastatic, symptomatic - n = 85 (19%)                                                                                                                                                                                 |
|            |                                                                                                                                                    |               | Lung - n = 132 (29%);<br>Head and neck - n = 95 (21%);<br>Gynaecological - n = 77 (17%);<br>Haematology/Lymphoma - n = 45 (10%);<br>Melanoma - n = 45 (10%);<br>Other - n = 54 (12%)                                   |
| CSS-25     | To screen for psychosocial distress among cancer patients.                                                                                         | USA           | Mixed cancer patients (n = 251):<br>Stage 0 - n = 10 (4%);<br>Stage I - n = 58 (25%);<br>Stage II - n = 57 (24%);<br>Stage III - n = 44 (19%);<br>Stage IV - n = 39 (17%);<br>Do not know - n = 26 (11%)               |
|            |                                                                                                                                                    |               | Breast - n = 108 (46%);<br>Gynecologic - n = 20 (9%);<br>Blood - n = 17 (7%);<br>Colorectal - n = 14 (6%);<br>Lung - n = 9 (4%);<br>Prostate - n = 9 (4%);<br>Other - n = 43 (18%);<br>Multiple reported - n = 16 (7%) |
| BCNAS-32   | To provide a comprehensive assessment of the multi-dimensional impact of bladder cancer on patients' outcomes and their current needs for support. | USA           | Bladder cancer patients (n = 159):<br>Stage 0 - n = 29 (18%);<br>Stage I - n = 59 (37%);<br>Stage II - n = 40 (25%);<br>Stage III - n = 13 (8%);<br>Stage IV - n = 10 (6%);<br>Do not know - n = 5 (3%)                |
| PCNQ V2    | To measure the perceived needs of men diagnosed with prostate cancer.                                                                              | Australia     | Prostate cancer patients (n = 300):<br>Localised - n = 172 (57%);<br>Advanced - n = 50 (17%);<br>Do not know - n = 78 (26%)                                                                                            |
| YYFcore03  | To screen for biopsychosocial distress of newly diagnosed cancer patients in the outpatient setting.                                               | USA           | Mixed cancer patients (n = 608):<br>Breast - n = 262 (43%);<br>Genitourinary - n = 77 (13%);<br>Other organs - n = 80 (13%);<br>Prostate/testes - n = 59 (10%);<br>Benign/non-neoplasm - n = 130 (21%)                 |

## Online Resource 7: Validation studies in languages other than English

| Instrument <sup>a</sup> | Language               | Reference                                                                                                                                                                                                                                                                                                                                                                                                                                              |
|-------------------------|------------------------|--------------------------------------------------------------------------------------------------------------------------------------------------------------------------------------------------------------------------------------------------------------------------------------------------------------------------------------------------------------------------------------------------------------------------------------------------------|
| <i>SPARC</i>            | Polish                 | Leppert W, Majkowicz M, Ahmedzai SH. The adaptation of the Sheffield Profile for Assessment and Referral for Care (SPARC) to the Polish clinical setting for needs assessment of advanced cancer patients. <i>J Pain Symptom Manage</i> . 2012 Dec 1;44(6):916-22.<br><a href="https://doi.org/10.1016/j.jpainsymman.2011.12.286">https://doi.org/10.1016/j.jpainsymman.2011.12.286</a>                                                                |
| <i>PNPC-sv</i>          | Chinese                | Wang T, Molassiotis A, Chung BP, Tan JY. Psychometric assessment of the Chinese version of the Problems and Needs in Palliative Care questionnaire-short version in advanced cancer patients. <i>BMC Palliat Care</i> . 2019 Dec;18(1):1-2. <a href="https://doi.org/10.1186/s12904-019-0450-5">https://doi.org/10.1186/s12904-019-0450-5</a>                                                                                                          |
| <i>CaNDI</i>            | Turkish                | Beyhun NE, Can G, Tiryaki A, Karakullukcu S, Bulut B, Yesilbas S, Kavgaci H, Topbas M. Validity and Reliability of the Turkish Version of Needs Based Biopsychosocial Distress Instrument for Cancer Patients (CANDI). <i>Iran Red Crescent Med J</i> . 2016 Jun;18(6). <a href="https://doi.org/10.5812/ircmj.27352">https://doi.org/10.5812/ircmj.27352</a>                                                                                          |
| <i>CNAT</i>             | Chinese                | Zhang YP, Wei HH, Zhao XS, Zhang Y, Xu YQ, Porr C. Cross-Cultural Adaptation and Validation of the Comprehensive Needs Assessment Tool (CNAT) for Chinese Cancer Patients. <i>Eur J Pers Cent Healthc</i> . 2016 Jun 24;4(1):241-9. <a href="http://dx.doi.org/10.5750/ejpc.v4i1.1078">http://dx.doi.org/10.5750/ejpc.v4i1.1078</a>                                                                                                                    |
| <i>SCNS-SF34</i>        | Dutch                  | Li WW, Lam WW, Shun SC, Lai YH, Law WL, Poon J, Fielding R. Psychometric assessment of the Chinese version of the Supportive Care Needs Survey short-form (SCNS-SF34-C) among Hong Kong and Taiwanese Chinese colorectal cancer patients. <i>PLoS one</i> . 2013 Oct 11;8(10):e75755.<br><a href="https://doi.org/10.1371/journal.pone.0075755">https://doi.org/10.1371/journal.pone.0075755</a>                                                       |
|                         | French                 | Bredart A, Kop JL, Griesser AC, Zaman K, Panes-Ruedin B, Jeanneret W, DELALOYE JF, Zimmers S, Jacob A, Berthet V, Fiszer C. Validation of the 34-item Supportive Care Needs Survey and 8-item breast module French versions (SCNS-SF34-Fr and SCNS-BR8-Fr) in breast cancer patients. <i>Eur J Cancer Care</i> . 2012 Jul;21(4):450-9. <a href="https://doi.org/10.1111/j.1365-2354.2012.01356.x">https://doi.org/10.1111/j.1365-2354.2012.01356.x</a> |
|                         | German                 | Lehmann C, Koch U, Mehnert A. Psychometric properties of the German version of the short-form supportive care needs survey questionnaire (SCNS-SF34-G). <i>Support Care Cancer</i> . 2012 Oct;20(10):2415-24.<br><a href="https://doi.org/10.1007/s00520-011-1351-1">https://doi.org/10.1007/s00520-011-1351-1</a>                                                                                                                                     |
|                         | Italian                | Zeneli A, Fabbri E, Donati E, Tierney G, Pasa S, Berardi MA, Maltoni M. Translation of supportive care needs survey short form 34 (SCNS-SF34) into Italian and cultural validation study. <i>Support Care Cancer</i> . 2016 Feb 1;24(2):843-8. <a href="https://doi.org/10.1007/s00520-015-2852-0">https://doi.org/10.1007/s00520-015-2852-0</a>                                                                                                       |
|                         | Japanese               | Okuyama T, Akechi T, Yamashita H, Toyama T, Endo C, Sagawa R, Uchida M, Furukawa TA. Reliability and validity of the Japanese version of the Short-form Supportive Care Needs Survey Questionnaire (SCNS-SF34-J). <i>Psychooncology</i> . 2009 Sep;18(9):1003-10. <a href="https://doi.org/10.1002/pon.1482">https://doi.org/10.1002/pon.1482</a>                                                                                                      |
|                         | Mandarin and Cantonese | Au A, Lam WW, Kwong A, Suen D, Tsang J, Yeo W, Suen J, Ho WM, Yau TK, Soong I, Wong KY. Validation of the Chinese version of the short-form Supportive Care Needs Survey Questionnaire (SCNS-SF34-C). <i>Psychooncology</i> . 2011 Dec;20(12):1292-300. <a href="https://doi.org/10.1002/pon.1851">https://doi.org/10.1002/pon.1851</a>                                                                                                                |
|                         | Mandarin               | Han Y, Zhou Y, Wang J, Zhao Q, Qin H, Fan Y, Song Y, Boyes A, Cui S. Psychometric testing of the Mandarin version of the 34-item Short-Form Supportive Care Needs Survey in patients with cancer in mainland China. <i>Support Care Cancer</i> . 2017 Nov;25(11):3329-38.<br><a href="https://doi.org/10.1007/s00520-017-3750-4">https://doi.org/10.1007/s00520-017-3750-4</a>                                                                         |

| Instrument <sup>a</sup> | Language            | Reference                                                                                                                                                                                                                                                                                                                                                                                                           |
|-------------------------|---------------------|---------------------------------------------------------------------------------------------------------------------------------------------------------------------------------------------------------------------------------------------------------------------------------------------------------------------------------------------------------------------------------------------------------------------|
|                         | Mexican             | Doubova SV, Aguirre-Hernandez R, Gutiérrez-de la Barrera M, Infante-Castañeda C, Pérez-Cuevas R. Supportive care needs of Mexican adult cancer patients: validation of the Mexican version of the Short-Form Supportive Care Needs Questionnaire (SCNS-SFM). <i>Support Care Cancer</i> . 2015 Sep;23(9):2711-9. <a href="https://doi.org/10.1007/s00520-015-2634-8">https://doi.org/10.1007/s00520-015-2634-8</a>  |
|                         | Nepali              | Dhakal K, Wang P, Mboineki JF, Getu MA, Chen C, Boyes A, Sharma C, Ghimire BR, Adhikari A, Adhikari B. Translation of Supportive Care Needs Survey Short Form 34 (SCNS-SF34) into Nepali Language with Cultural Validation. Pre-print. <a href="https://doi.org/10.21203/rs.3.rs-213979/v1">https://doi.org/10.21203/rs.3.rs-213979/v1</a>                                                                          |
|                         | Traditional Chinese | Li WW, Lam WW, Shun SC, Lai YH, Law WL, Poon J, Fielding R. Psychometric assessment of the Chinese version of the Supportive Care Needs Survey short-form (SCNS-SF34-C) among Hong Kong and Taiwanese Chinese colorectal cancer patients. <i>PLoS one</i> . 2013 Oct 11;8(10):e75755. <a href="https://doi.org/10.1371/journal.pone.0075755">https://doi.org/10.1371/journal.pone.0075755</a>                       |
|                         | Turkish             | Özbayır T, Geçkil ÖS, Aslan A. An adaptation of the short-form supportive care needs survey questionnaire (SCNS-SF 34) into Turkish. <i>Eur J Breast Health</i> . 2017 Oct;13(4):183. <a href="https://dx.doi.org/10.5152%2Ftjhb.2017.3266">https://dx.doi.org/10.5152%2Ftjhb.2017.3266</a>                                                                                                                         |
| <i>SCNS-ST9</i>         | Chinese             | Chan-Chuan HU, Kai-Lin YO, Li-Yun TS, Yuan-Yuan FA, Jhang SY, Pei-Jen LO, Cheng-Ping WA, Jenq-Yuh KO, Yun-Hsiang LE, Yeur-Hur LA. Validation of the Supportive Care Needs Survey Screening Tool Chinese Version for Patients With Head and Neck Cancer in Taiwan. <i>J Nurs Res</i> . 2019 Dec 1;27(6):e50. <a href="https://doi.org/10.1097/jnr.0000000000000360">https://doi.org/10.1097/jnr.0000000000000360</a> |
| <i>NEQ</i>              | Greek               | Konstantinidis TI, Samonis G, Sarafis P, Philalithis A. Assessment of needs of hospitalized cancer patients with advanced cancer. <i>Glob J Health Sci</i> . 2017;9:184-4. <a href="http://dx.doi.org/10.5539/gjhs.v9n6p184">http://dx.doi.org/10.5539/gjhs.v9n6p184</a>                                                                                                                                            |
| <i>CNQ-sf</i>           | Arabic              | Sharour LA. Translation and Validation of the Arabic Version of the Cancer Needs Questionnaire-Short Form. <i>Asia Pac J Oncol Nurs</i> . 2021 Jan;8(1):74. <a href="https://dx.doi.org/10.4103%2Fapjon.apjon_33_20">https://dx.doi.org/10.4103%2Fapjon.apjon_33_20</a>                                                                                                                                             |
|                         | Chinese             | Chen SC, Lai YH, Cheng SY, Liao CT, Chang JT. Psychometric testing of the Chinese-version cancer needs questionnaire short form head and neck cancer-specific version in oral cavity cancer patients. <i>Support Care Cancer</i> . 2011 May;19(5):647-56. <a href="https://doi.org/10.1007/s00520-010-0877-y">https://doi.org/10.1007/s00520-010-0877-y</a>                                                         |

<sup>a</sup>Though the review included 24 instruments, this table only includes those with an additional language validation.

Online Resource 8: Other techniques used in instrument development

| Instrument | Item generation            | Item reduction                                                                                                    |
|------------|----------------------------|-------------------------------------------------------------------------------------------------------------------|
| SPARC      |                            | Cognitive interviews with professionals; item analysis                                                            |
| NA-ALCP    |                            | Test-retest reliability                                                                                           |
| PNPC       | Caregiver interviews       |                                                                                                                   |
| PCNA-EAV   | Author knowledge           |                                                                                                                   |
| CaNDI      |                            | Health professional focus group                                                                                   |
| SCNS-SF34  |                            | Floor/ceiling effects; Item-total correlations; Author review (for “clinical relevance”)                          |
| SCNAT-IP   | Key informant focus groups | Key informant focus groups                                                                                        |
| SCNS-ST9   |                            | Sensitivity and specificity; Item variation explained; ROC curve analysis; Positive and negative predictive value |
| NEQ        |                            | Problematic items eliminated after initial field-testing; Test-retest reliability                                 |
| YYFcore03  | Patient data               |                                                                                                                   |

## Online Resource 9: References to support development quality appraisal

| Instrument              | Reference                                                                                                                                                                                                                                                                                                                                  |
|-------------------------|--------------------------------------------------------------------------------------------------------------------------------------------------------------------------------------------------------------------------------------------------------------------------------------------------------------------------------------------|
| <i>SPARC</i>            | Bestall JC, Ahmed N, Ahmedzai SH, Payne SA, Noble B, Clark D. Access and referral to specialist palliative care: patients' and professionals' experiences. <i>Int J Palliat Nurs</i> . 2004 Aug;10(8):381-9. <a href="https://doi.org/10.12968/ijpn.2004.10.8.15874">https://doi.org/10.12968/ijpn.2004.10.8.15874</a>                     |
| <i>PNPC</i>             | Osse BH, Vernooij-Dassen MJ, Schadé E, de Vree B, van den Muijsenbergh ME, Grol RP. Problems to discuss with cancer patients in palliative care: a comprehensive approach. <i>Patient Educ Couns</i> . 2002 Jul 1;47(3):195-204. <a href="https://doi.org/10.1016/S0738-3991(02)00019-8">https://doi.org/10.1016/S0738-3991(02)00019-8</a> |
| <i>CaNDI</i>            | Clark K, Bardwell WA, Arsenault T, DeTeresa R, Loscalzo M. Implementing touch-screen technology to enhance recognition of distress. <i>Psychooncology</i> . 2009 Aug;18(8):822-30. <a href="https://doi.org/10.1002/pon.1509">https://doi.org/10.1002/pon.1509</a>                                                                         |
| <i>SCNS<sup>a</sup></i> | Foot G, Sanson-Fisher R. Measuring the unmet needs of people living with cancer. <i>Cancer Forum</i> 1995 (Vol. 19, No. 2, pp. 131-135).                                                                                                                                                                                                   |
| <i>BCNAS-32</i>         | Mohamed NE, Herrera PC, Hudson S, Revenson TA, Lee CT, Quale DZ, Zarcadoolas C, Hall SJ, Diefenbach MA. Muscle invasive bladder cancer: examining survivor burden and unmet needs. <i>J Urol</i> . 2014 Jan 1;191(1):48-53. <a href="https://doi.org/10.1016/j.juro.2013.07.062">https://doi.org/10.1016/j.juro.2013.07.062</a>            |
| <i>YYFcore03</i>        | Loscalzo MJ, Clark KL. Problem-related distress in cancer patients drives requests for help: a prospective study. <i>Oncology</i> . 2007 Aug 1;21(9):1133.                                                                                                                                                                                 |

<sup>a</sup>References listed for SCNS are applicable to the LF59, SF34, and ST9.



## Online Resource 10: Dimension development

| <b>Instrument</b>           | <b>Dimension development</b>                                                         | <b>Dimensions (as described by authors of the validation study(ies) included in the review)</b>                                                                                                                                                                                                             |
|-----------------------------|--------------------------------------------------------------------------------------|-------------------------------------------------------------------------------------------------------------------------------------------------------------------------------------------------------------------------------------------------------------------------------------------------------------|
| <i>PNAP</i>                 | Confirmatory factor analysis;<br>Health professional focus group                     | Physical symptoms; Social area; Respect and support from health professionals; Meaning of life and reconciliation; Autonomy; Chance to share emotions; Religious needs                                                                                                                                      |
| <i>SPARC</i>                | Literature; Author grouped                                                           | Communication and information issues; Physical symptoms; Psychological issues; Religious and spiritual issues; Independence and activity; Family and social issues; Treatment issues                                                                                                                        |
| <i>NA-ACP</i>               | Principal component analysis;<br>Literature                                          | Medical communication/information;<br>Psychological/Emotional; Daily living; Financial;<br>Symptom; Spiritual; Social                                                                                                                                                                                       |
| <i>NA-ALCP</i>              | Existing instrument                                                                  | Medical communication; Psychological/emotional;<br>Daily living; Financial; Symptom;<br>Spiritual/existential; Social                                                                                                                                                                                       |
| <i>PNPC</i>                 | Literature; Patient interviews                                                       | Activities of daily living; Physical symptoms; Role activities; Financial and administrative issues; Social issues; Psychological issues; Spiritual issues;<br>Autonomy; Information needs; Problems in consultations; Overriding problems in quality of care; Concerning the GP; Concerning the specialist |
| <i>PNPC-sv</i>              | Existing instrument                                                                  | Daily activities; Physical symptoms; Autonomy;<br>Social issues; Psychological issues; Spiritual issues;<br>Financial issues; Need of information                                                                                                                                                           |
| <i>SPEED</i><br><i>3LNQ</i> | Literature; Expert panel<br>Literature; Existing instrument                          | Physical; Spiritual; Social; Therapeutic; Psychological<br>Physical function; Role function; Depression; Worry;<br>Concentration; Social function; Fatigue; Nausea; Pain;<br>Dyspnea; Reduced appetite; Sexuality; Feeling as a burden; Loneliness                                                          |
| <i>Ndiok</i>                | Conceptual needs model                                                               | Information needs; Spiritual issues; Psychological issues; Activities of daily living; Physical symptoms;<br>Financial issues; Social issues; Self-sufficiency;<br>Problems in consultations; Problems in quality of care;<br>Concerning the nurses                                                         |
| <i>PCNA-EAV</i>             | Literature; Review of existing instruments                                           | Physical/functional; Social; Psychological/emotional;<br>Information; Communication; Helpful resources;<br>Financial; Religious/spiritual; Priority of need;<br>Preference for care                                                                                                                         |
| <i>CaNDI</i>                | Biopsychosocial model                                                                | Depression; Anxiety; Emotion; Social; Health care;<br>Practical; Physical                                                                                                                                                                                                                                   |
| <i>CNAT</i>                 | Exploratory factor analysis                                                          | Health care staff; Psychological problems; Physical symptoms; Information; Social/religious/spiritual support; Practical support; Hospital facilities and services;                                                                                                                                         |
| <i>PNI</i>                  | Author grouped                                                                       | Health professional; Information; Support network;<br>Identity; Emotional and spiritual; Practical; Practical: child                                                                                                                                                                                        |
| <i>eHNA</i>                 | Exploratory factor analysis;<br>Principal component analysis                         | Emotional/spiritual; Oral effects; Activities of daily living; Caring/relationships; Surgery; Physiological effects; Toilet/pain; Gut; Treatment outcomes;<br>Practical; Sexuality; Weight                                                                                                                  |
| <i>SCNS-SF34</i>            | Exploratory factor analysis;<br>Confirmatory factor analysis;<br>Existing instrument | Psychological; Health systems and information;<br>Patient care and support; Physical and daily living;<br>Sexuality                                                                                                                                                                                         |
| <i>SCNAT-IP</i>             | Existing instrument                                                                  | Physical and Psychological; Health care; Practical and Cultural; Information and Communication                                                                                                                                                                                                              |

| <b>Instrument</b> | <b>Dimension development</b>                              | <b>Dimensions (as described by authors of the validation study(ies) included in the review)</b>                                                                                                                                                                                                                                                                                                                                |
|-------------------|-----------------------------------------------------------|--------------------------------------------------------------------------------------------------------------------------------------------------------------------------------------------------------------------------------------------------------------------------------------------------------------------------------------------------------------------------------------------------------------------------------|
| <i>SCNS-ST9</i>   | Existing instrument                                       | Psychological; Health systems and information; Patient care and support; Physical and daily living; Sexuality                                                                                                                                                                                                                                                                                                                  |
| <i>SCNS-LF59</i>  | Principal component analysis; Existing instrument         | Psychological; Health systems and information; Patient care and support; Physical and daily living; Sexuality                                                                                                                                                                                                                                                                                                                  |
| <i>NEQ</i>        | Exploratory factor analysis; Confirmatory factor analysis | Tamburini: Information (diagnosis & prognosis); Information (exams & treatment); Communicational; Relational<br>Annunziata: Informative; Assistance/care related, Relational; Psycho-emotional support; Material                                                                                                                                                                                                               |
| <i>CNQ-sf</i>     | Principal component analysis                              | Psychological; Health information; Physical and daily living; Patient care and support; Interpersonal communication needs                                                                                                                                                                                                                                                                                                      |
| <i>CSS-25</i>     | Exploratory factor analysis; Confirmatory factor analysis | Emotional wellbeing; Symptom burden and impact; Body image and healthy lifestyle; Health care team communication; Relationships and intimacy                                                                                                                                                                                                                                                                                   |
| <i>BCNAS-32</i>   | Exploratory factor analysis                               | Psychological; Health system; Physical and daily living; Patient care and support; Sexuality; Logistics; Communication (spouse/partner); Communication (medical providers)                                                                                                                                                                                                                                                     |
| <i>PCNQ V2</i>    | Principal component analysis                              | Part 1 (past issues and experiences): Specialist support; Anxiety and urgency; Confidence in treatment preparation and recovery; Knowledge and understanding; GP support; Informed choice; Other support for diagnosis and treatment<br>Part 2 (current issues and experiences): Role limitations; GP ongoing support; Impotence and sexual issues; Incontinence; Personal integration and control; Specialist ongoing support |
| <i>YYFcore03</i>  | Exploratory factor analysis                               | Psychological distress; Logistics of medical care; Somatization (physical, practical, psychological, social problems)                                                                                                                                                                                                                                                                                                          |

### Online Resource 11: Overall methodological quality appraisal

See ‘Online Resource clinimetrics’ spreadsheet - worksheet ‘Online Resource 11’.

<sup>a</sup>Original development was not accessible for CNQ-SF and not available for eHNA.

<sup>b</sup>In COSMIN, an item can be rated as *inadequate* if it has not been done, not been reported, or done inadequately.

### Online Resource 12: GRADE levels of evidence with reasons

See ‘Online Resource clinimetrics’ spreadsheet – worksheet ‘Online Resource 12’.

### Online Resource 13: Quality appraisal with reasons

See ‘Online Resource clinimetrics’ spreadsheet – worksheet ‘Online Resource 13’.

<sup>a</sup>As long as at least one of the ICCs/Kappa’s was  $>0.70$ , the instrument was rated as sufficient.

## Online Resource 14: Instrument feasibility

| <b>Instrument</b> | <i>Patient's comprehensibility</i>                                                                                    | <i>Clinician's comprehensibility</i> | <i>Type and ease of administration</i> | <i>Length of the instrument (items)</i> | <i>Completion time (mins)</i> | <i>Patient's required mental and physical ability level</i> |
|-------------------|-----------------------------------------------------------------------------------------------------------------------|--------------------------------------|----------------------------------------|-----------------------------------------|-------------------------------|-------------------------------------------------------------|
| <i>PNAP</i>       | Not reported                                                                                                          | Not reported                         | Not reported                           | 40                                      | 45                            | Not reported                                                |
| <i>SPARC</i>      | Items and response options were edited in response to patient feedback to improve understanding.                      | Not reported                         | Moderate - Interviewer-administered    | 46                                      | 15 to 20                      | Not reported                                                |
| <i>NA-ACP</i>     | 86% found instrument clear and understandable. Flesch score of 76.9, understandable by 90% of people 25-64 years old. | Not reported                         | Easy - Self-administered               | 132                                     | 76                            | Understandable by 90% of people 25-64 years old.            |
| <i>NA-ALCP</i>    | Items and response options considered "understandable".                                                               | Not reported                         | Easy - Self-administered               | 38                                      | Not reported                  | Not reported                                                |
| <i>PNPC</i>       | Not reported                                                                                                          | Not reported                         | Easy - Self-administered               | 138                                     | Not reported                  | Not reported                                                |
| <i>PNPC-sv</i>    | Not reported                                                                                                          | Not reported                         | Easy - Self-administered               | 33                                      | 10                            | Not reported                                                |
| <i>SPEED</i>      | Not reported                                                                                                          | Not reported                         | Moderate - Interviewer-administered    | 13                                      | Not reported                  | Not reported                                                |
| <i>3LNQ</i>       | "Questions understood in same way by researcher and patient"                                                          | Not reported                         | Easy - Self-administered               | 35                                      | Not reported                  | Not reported                                                |
| <i>Ndiok</i>      | Not reported                                                                                                          | Not reported                         | Moderate - Interviewer-administered    | 104                                     | Not reported                  | Not reported                                                |
| <i>PCNA-EAV</i>   | Considered by clinicians to be comprehensible for target population.                                                  | Not reported                         | Moderate - Interviewer-administered    | 116                                     | 40                            | Not reported                                                |
| <i>CaNDI</i>      | 5.5 reading grade level calculated by Flesch-Kincaid.                                                                 | Not reported                         | Easy - Self-administered               | 39                                      | 8                             | Understandable by >90% of people 25-64 years old.           |
| <i>CNAT</i>       | Not reported                                                                                                          | Not reported                         | Moderate - Interviewer-administered    | 59                                      | Not reported                  | Not reported                                                |
| <i>PNI</i>        | Not reported                                                                                                          | Not reported                         | Easy - Self-administered               | 48                                      | Not reported                  | Not reported                                                |

| <b>Instrument</b> | <i>Patient's comprehensibility</i>                                                                                         | <i>Clinician's comprehensibility</i> | <i>Type and ease of administration</i> | <i>Length of the instrument (items)</i> | <i>Completion time (mins)</i> | <i>Patient's required mental and physical ability level</i> |
|-------------------|----------------------------------------------------------------------------------------------------------------------------|--------------------------------------|----------------------------------------|-----------------------------------------|-------------------------------|-------------------------------------------------------------|
| <i>eHNA</i>       | Not reported                                                                                                               | Not reported                         | Easy - Self-administered               | 48                                      | 7                             | Not reported                                                |
| <i>SCNS-SF34</i>  | Favourable comprehensibility reported by patients. Can be understood by people with a seventh grade level of education.    | Not reported                         | Easy - Self-administered               | 34                                      | 10                            | Not reported                                                |
| <i>SCNAT-IP</i>   | Item wording simplified to increase understanding.                                                                         | Not reported                         | Moderate - Interviewer-administered    | 27 (26 and 1 open ended question)       | 15                            | Not reported                                                |
| <i>SCNS-ST9</i>   | Favourable comprehensibility reported by patients. Can be understood by people with a fourth to fifth grade reading level. | Not reported                         | Easy - Self-administered               | 9                                       | Not reported                  | Not reported                                                |
| <i>SCNS-LF59</i>  | Favourable comprehensibility reported by patients. Can be understood by people with a fourth to fifth grade reading level. | Not reported                         | Easy - Self-administered               | 59                                      | 20                            | Not reported                                                |
| <i>NEQ</i>        | Good patient comprehensibility indicated by low missing scores and high satisfaction.                                      | Not reported                         | Easy - Self-administered               | 23                                      | 5                             | Not reported                                                |
| <i>CNQ-sf</i>     | Not reported                                                                                                               | Not reported                         | Easy - Self-administered               | 32                                      | Not reported                  | Not reported                                                |
| <i>CSS-25</i>     | Not reported                                                                                                               | Not reported                         | Easy - Self-administered               | 25                                      | 5 to 10                       | Not reported                                                |
| <i>BCNAS-32</i>   | Not reported                                                                                                               | Not reported                         | Easy - Self-administered               | 32                                      | Not reported                  | Not reported                                                |
| <i>PCNQ V2</i>    | Demonstrated to be understandable to the target population.                                                                | Not reported                         | Easy - Self-administered               | 69 (part 1: 39; part 2: 30)             | 30                            | Not reported                                                |
| <i>YYFcore03</i>  | Not reported                                                                                                               | Not reported                         | Easy - Self-administered               | 31                                      | Not reported                  | Not reported                                                |

| <b>Instrument</b> | <i>Ease of standardisation</i> | <i>Ease of score calculation</i>                                                                                                                                | <i>Copyright</i>                          | <i>Cost of an instrument</i> | <i>Required equipment</i>  | <i>Availability in different settings</i> | <i>Regulatory agency's requirement for approval</i> |
|-------------------|--------------------------------|-----------------------------------------------------------------------------------------------------------------------------------------------------------------|-------------------------------------------|------------------------------|----------------------------|-------------------------------------------|-----------------------------------------------------|
| <i>PNAP</i>       | Not reported                   | Easy - scoring of individual items and total sum of item scores.                                                                                                | None reported (not reported)              | None reported                | Pen and printed instrument | Clinical and research                     | None reported                                       |
| <i>SPARC</i>      | Not reported                   | Easy - sum of item scores for each subscale and scoring of individual items.                                                                                    | None reported (downloadable from the web) | None                         | Pen and printed instrument | Clinical and research                     | None reported                                       |
| <i>NA-ACP</i>     | Not reported                   | Moderate - simple formula - need to transform scoring data so not applicable (=0), satisfied need (=2), high need (=3), before summing items for each subscale. | None reported (email authors)             | None reported                | Pen and printed instrument | Clinical and research                     | None reported                                       |
| <i>NA-ALCP</i>    | Not reported                   | Moderate - simple formula - sum scores for items in each domain and divide by total number of items.                                                            | None reported (paper appendix)            | None reported                | Pen and printed instrument | Clinical and research                     | None reported                                       |
| <i>PNPC</i>       | Not reported                   | Easy - scoring of individual items/ sum of item scores for each subscale.                                                                                       | None reported (paper appendix)            | None reported                | Pen and printed instrument | Clinical and research                     | None reported                                       |
| <i>PNPC-sv</i>    | Not reported                   | Easy - scoring of individual items.                                                                                                                             | None reported (paper appendix)            | None reported                | Pen and printed instrument | Clinical and research                     | None reported                                       |
| <i>SPEED</i>      | Not reported                   | Easy - scoring of individual items.                                                                                                                             | None reported (within paper)              | None reported                | Pen and printed instrument | Clinical                                  | None reported                                       |
| <i>3LNQ</i>       | Not reported                   | Moderate - simple formula, but subscales have different response options. Some question responses can be dichotomized into "unmet need" or "no need".           | None reported (paper appendix)            | None reported                | Pen and printed instrument | Clinical and research                     | None reported                                       |
| <i>Ndiok</i>      | Not reported                   | Easy - scoring of individual items.                                                                                                                             | None reported (within paper)              | None reported                | Pen and printed instrument | Clinical and research                     | None reported                                       |

| <b>Instrument</b> | <i>Ease of standardisation</i>                                                                                                                                                  | <i>Ease of score calculation</i>                                                                                                             | <i>Copyright</i>                                                                                                                                 | <i>Cost of an instrument</i> | <i>Required equipment</i>                        | <i>Availability in different settings</i> | <i>Regulatory agency's requirement for approval</i> |
|-------------------|---------------------------------------------------------------------------------------------------------------------------------------------------------------------------------|----------------------------------------------------------------------------------------------------------------------------------------------|--------------------------------------------------------------------------------------------------------------------------------------------------|------------------------------|--------------------------------------------------|-------------------------------------------|-----------------------------------------------------|
| <i>PCNA-EAV</i>   | Not reported                                                                                                                                                                    | Easy - sum of item scores for each subscale and scoring of individual items.                                                                 | Copyright 2011 by ProQuest LLC. (paper appendix)                                                                                                 | None reported                | Pen and printed instrument                       | Not reported                              | None reported                                       |
| <i>CaNDI</i>      | Not reported                                                                                                                                                                    | Easy - total sum of item scores and sum of item scores for each subscale.                                                                    | None reported (paper appendix)                                                                                                                   | None reported                | Pen and printed instrument/ Touchscreen computer | Clinical and research                     | None reported                                       |
| <i>CNAT</i>       | Not reported                                                                                                                                                                    | Easy - total sum of item scores.                                                                                                             | None reported (within paper)                                                                                                                     | None reported                | Pen and printed instrument                       | Clinical and research                     | None reported                                       |
| <i>PNI</i>        | Not reported                                                                                                                                                                    | Easy - sum of item scores for each subscale.                                                                                                 | None reported (within paper)                                                                                                                     | None reported                | Pen and printed instrument                       | Clinical                                  | None reported                                       |
| <i>eHNA</i>       | Not reported                                                                                                                                                                    | Easy - scoring of individual items/ total sum of item scores.                                                                                | Macmillan Cancer Support 2020 (sign up on Macmillan website)                                                                                     | None                         | Touchscreen computer                             | Clinical                                  | None reported                                       |
| <i>SCNS-SF34</i>  | Complex - summing the individual items, subtracting m, and then multiplying the resulting value by $100/(m \times (k-1))$ for each subscale.                                    | Complex - summing the individual items, subtracting m, and then multiplying the resulting value by $100/(m \times (k-1))$ for each subscale. | Supportive Care Needs Survey – Long Form 59 @ Centre for Health Research & Psycho-oncology, 2003, all right reserved (downloadable from the web) | None                         | Pen and printed instrument/ Touchscreen computer | Clinical and research                     | None reported                                       |
| <i>SCNAT-IP</i>   | Complex - (domain total score- $m \times 100 / (m \times (k-1))$ ), in which m is the number of questions in a domain and k is the value of the maximum response for each item. | Easy - sum of item scores for each subscale/ total sum of item scores.                                                                       | None reported (downloadable from SCNAT-IP website once completed training)                                                                       | None                         | Pen and printed instrument/ Computer             | Clinical                                  | None reported                                       |

| <b>Instrument</b> | <i>Ease of standardisation</i>                                                                                                               | <i>Ease of score calculation</i>                                                                                                             | <i>Copyright</i>                                                                                                                    | <i>Cost of an instrument</i> | <i>Required equipment</i>                        | <i>Availability in different settings</i> | <i>Regulatory agency's requirement for approval</i> |
|-------------------|----------------------------------------------------------------------------------------------------------------------------------------------|----------------------------------------------------------------------------------------------------------------------------------------------|-------------------------------------------------------------------------------------------------------------------------------------|------------------------------|--------------------------------------------------|-------------------------------------------|-----------------------------------------------------|
| <i>SCNS-ST9</i>   | Not reported                                                                                                                                 | Easy - scoring of individual items.                                                                                                          | Supportive Care Needs Survey – Long Form 59 @ Centre for Health Research & Psycho-oncology, 2003, all right reserved (within paper) | None                         | Pen and printed instrument/ Touchscreen computer | Clinical and research                     | None reported                                       |
| <i>SCNS-LF59</i>  | Complex - summing the individual items, subtracting m, and then multiplying the resulting value by $100/(m \times (k-1))$ for each subscale. | Complex - summing the individual items, subtracting m, and then multiplying the resulting value by $100/(m \times (k-1))$ for each subscale. | Supportive Care Needs Survey – Long Form 59 @ Centre for Health Research & Psycho-oncology, 2003, all right reserved (within paper) | None                         | Pen and printed instrument/ Touchscreen computer | Clinical and research                     | None reported                                       |
| <i>NEQ</i>        | Not reported                                                                                                                                 | Easy - scoring of individual items/ sum of item scores for each subscale.                                                                    | In the public domain (within paper)                                                                                                 | None                         | Pen and printed instrument                       | Clinical and research                     | None reported                                       |
| <i>CNQ-sf</i>     | Not reported                                                                                                                                 | Complex - scores converted to a score ranging from 0 to 100, but formula not reported. Sum of converted item scores for each subscale.       | None reported (within paper)                                                                                                        | None                         | Touchscreen computer                             | Clinical and research                     | None reported                                       |
| <i>CSS-25</i>     | Not reported                                                                                                                                 | Moderate - total sum of item scores rated at or above two.                                                                                   | None reported (downloadable from the web)                                                                                           | None                         | Computer                                         | Clinical, research and community          | None reported                                       |
| <i>BCNAS-32</i>   | "Computed as recommended for the SCNS-LF59"                                                                                                  | "Computed as recommended for the SCNS-LF59"                                                                                                  | None reported (within paper)                                                                                                        | None reported                | Computer                                         | Clinical                                  | None reported                                       |
| <i>PCNQ V2</i>    | Not reported                                                                                                                                 | Easy - scoring of individual items.                                                                                                          | None reported (within paper)                                                                                                        | None                         | Pen and printed instrument                       | Clinical                                  | None reported                                       |
| <i>YYFcore03</i>  | Not reported                                                                                                                                 | Easy - scoring of individual items.                                                                                                          | None reported (within paper)                                                                                                        | None reported                | Touchpad                                         | Clinical                                  | None reported                                       |



## Online Resource 15: Instrument interpretability

| <b>Instrument</b> | <i>Distribution of scores in the study population</i> | <i>Percentage of missing items and percentage of missing total scores</i>    | <i>Floor and ceiling effects</i>                                   | <i>Scores and change scores available for relevant (sub)groups</i>                                                                         | <i>Minimal important change (MIC) or minimal important difference (MID)</i> | <i>Information of response shift</i> |
|-------------------|-------------------------------------------------------|------------------------------------------------------------------------------|--------------------------------------------------------------------|--------------------------------------------------------------------------------------------------------------------------------------------|-----------------------------------------------------------------------------|--------------------------------------|
| <i>PNAP</i>       | Not reported.                                         | Not reported.                                                                | Not reported.                                                      | Not reported.                                                                                                                              | Not reported.                                                               | Not reported.                        |
| <i>SPARC</i>      | Not reported.                                         | At least one question missing in 32 (51%) of 63 patients assessed.           | Items exhibiting floor or ceiling effects were deleted or amended. | Not reported.                                                                                                                              | Not reported.                                                               | Not reported.                        |
| <i>NA-ACP</i>     | Not reported.                                         | Not reported.                                                                | Not reported.                                                      | Not reported.                                                                                                                              | Not reported.                                                               | Not reported.                        |
| <i>NA-ALCP</i>    | Not reported.                                         | <0.01%                                                                       | Not reported.                                                      | Not reported.                                                                                                                              | Not reported.                                                               | Not reported.                        |
| <i>PNPC</i>       | Yes - Frequency                                       | Not reported.                                                                | Not applicable.                                                    | Not reported.                                                                                                                              | Not reported.                                                               | Not reported.                        |
| <i>PNPC-sv</i>    | Yes - Frequency                                       | Not reported.                                                                | Not applicable.                                                    | Not reported.                                                                                                                              | Not reported.                                                               | Not reported.                        |
| <i>SPEED</i>      | Not reported                                          | Not reported                                                                 | Not reported.                                                      | Not reported.                                                                                                                              | Not reported.                                                               | Not reported.                        |
| <i>3LNQ</i>       | Yes - Means                                           | Not reported.                                                                | Not reported.                                                      | Not reported.                                                                                                                              | Not reported.                                                               | Not reported.                        |
| <i>Ndiok</i>      | Yes - Frequency                                       | Not reported.                                                                | Not applicable.                                                    | Not reported.                                                                                                                              | Not reported.                                                               | Not reported.                        |
| <i>PCNA-EAV</i>   | Yes - Mean and SD                                     | 0-8% for most individual items. Two items missing 16%, one item missing 26%. | Not reported.                                                      | Yes - scores for subgroups (gender, age, location of residence, and ECOG)                                                                  | Not reported.                                                               | Not reported.                        |
| <i>CaNDI</i>      | Yes - Mean and SD; median and range                   | 0-7% for individual items.                                                   | No ceiling effects were observed.                                  | Yes - scores for subgroups (infusion and multidisciplinary clinic)                                                                         | Not reported.                                                               | Not reported.                        |
| <i>CNAT</i>       | Yes - Frequency & median                              | Not reported.                                                                | Considerable floor effect and little ceiling effect reported.      | Yes - scores for subgroups (Karnofsky performance status, inpatient and outpatient, socio-demographics, treatment, stage, and cancer type) | Not reported.                                                               | Not reported.                        |

| <b>Instrument</b> | <i>Distribution of scores in the study population</i> | <i>Percentage of missing items and percentage of missing total scores</i> | <i>Floor and ceiling effects</i>                                          | <i>Scores and change scores available for relevant (sub)groups</i>                                       | <i>Minimal important change (MIC) or minimal important difference (MID)</i> | <i>Information of response shift</i> |
|-------------------|-------------------------------------------------------|---------------------------------------------------------------------------|---------------------------------------------------------------------------|----------------------------------------------------------------------------------------------------------|-----------------------------------------------------------------------------|--------------------------------------|
| <i>PNI</i>        | Yes - Frequency                                       | Not reported.                                                             | Not reported.                                                             | Yes - scores for subgroups (tumour type, critical moment, and global health status)                      | Not reported.                                                               | Not reported.                        |
| <i>eHNA</i>       | Yes - Frequency                                       | Not reported.                                                             | Not reported.                                                             | Yes - scores for subgroups (gender and curative)                                                         | Not reported.                                                               | Not reported.                        |
| <i>SCNS-SF34</i>  | Yes - Mean and SD                                     | Not reported.                                                             | No floor or ceiling effects observed.                                     | Yes - scores for subgroups (remission or not)                                                            | Not reported.                                                               | Not reported.                        |
| <i>SCNAT-IP</i>   | Yes - Mean, SD, Median and IQR                        | 0.4-1.6% for each item.                                                   | Seven items with floor effects were removed. No ceiling effects observed. | Not reported.                                                                                            | Not reported.                                                               | Not reported.                        |
| <i>SCNS-ST9</i>   | Yes - Frequency                                       | Not reported.                                                             | Not reported.                                                             | Not reported.                                                                                            | Not reported.                                                               | Not reported.                        |
| <i>SCNS-LF59</i>  | Not reported.                                         | Not reported.                                                             | Not reported.                                                             | Not reported.                                                                                            | Not reported.                                                               | Not reported.                        |
| <i>NEQ</i>        | Yes - Frequency                                       | 0-2% for each item.                                                       | Not applicable.                                                           | Yes - scores for subgroups (inpatients and outpatients)                                                  | Not reported.                                                               | Not reported.                        |
| <i>CNQ-sf</i>     | Yes - Mean and SD                                     | Not reported.                                                             | Not reported.                                                             | Yes - scores for subgroups (disease state, gender, ECOG performance status, treatment, fatigue, and age) | Not reported.                                                               | Not reported.                        |
| <i>CSS-25</i>     | Yes - Mean and SD                                     | <2% for each item.                                                        | Not reported.                                                             | Not reported.                                                                                            | Not reported.                                                               | Not reported.                        |
| <i>BCNAS-32</i>   | Yes - Mean and SD                                     | 6-18% for all subscales.                                                  | Not reported.                                                             | Not reported.                                                                                            | Not reported.                                                               | Not reported.                        |
| <i>PCNQ V2</i>    | Not reported.                                         | 43% of the sample missed at least one item.                               | Not reported.                                                             | Not reported.                                                                                            | Not reported.                                                               | Not reported.                        |
| <i>YF-core03</i>  | Not reported.                                         | Not reported.                                                             | Not reported.                                                             | Not reported.                                                                                            | Not reported.                                                               | Not reported.                        |
